# Supplementary material for: The Characteristics of Multilocus Sequence Typing, Virulence Genes and Drug Resistance of Klebsiella pneumoniae Isolated from Cattle in Northern Jiangsu, China
Source: MDPI journal article supplement (doi:10.3390/ani12192627), 2022-09-30
Supplement: s1 [file s1]

**Table S1.** Primers used for the PCR experiment.

| Genes | Sequence (5' – 3')                                            | Products (bp) |
|-------|---------------------------------------------------------------|---------------|
| gapA  | F: TGAAATATGACTCCACTCACGG<br>R: CTTCAGAAGCGGCTTTGATGGCTT      | 663           |
| infB  | F: CTCGCTGCTGGACTATATTCTG<br>R: CGCTTTCAGCTCAAGAACTTC         | 463           |
| mdh   | F: CCCAACTCGCTTCAGGTTTCAG<br>R: CCGTTTTTCCCCAGCAGCAG          | 757           |
| pgi   | F: GAGAAAAACCTGCCTGTACTGCTGGC<br>R: CGCGCCACGCTTTATAGCGGTAAAT | 718           |
| phoE  | F: ACCTACCGCAACACCGACTTCTTCGG<br>R: TGATCAGAACTGGTAGGTGAT     | 603           |
| rpoB  | F: GGCGAAATGGCWGAGAACCA<br>R: GAGTCTTCGAAGTTGTAACC            | 1076          |
| tonB  | F: CTTTATACCTCGGTACATCAGGTT<br>R: ATTCGCCGGCTGRGCRGAGAG       | 540           |
| rmpA  | F: ACTGGGCTACCTCTGCTTCA<br>R: CTTGCATGAGCCATCTTTCA            | 516           |
| wcaG  | F: GGTGGKTCAGCAATCGTA<br>R: ACTATTCCGCCAACTTTTGC              | 169           |
| allS  | F: CCGTTAGGCAATCCAGAC<br>R: TCTGATTTATCCCACATT                | 1090          |
| kfuBC | F: GAAGTGACGCTGTTTCTGGC<br>R: TTTCGTGTGGCCAGTGACTC            | 797           |
| ybtA  | F: ATGACGGAGTCACCGCAAAC<br>R: TTACATCACGCGTTTAAAGG            | 960           |
| iucB  | F: ATGTCTAAGGCAAACATCGT<br>R: TTACAGACCGACCTCCGTGA            | 948           |
| iroNB | F: GGCTACTGATACTTGACTATTC<br>R: CAGGATACAATAGCCCATAG          | 992           |

---

|      |                            |     |
|------|----------------------------|-----|
| fimH | F: GCTCTGGCCGATACCACCACGG  | 423 |
|      | R: GCGAAGTAACGTGCCTGGAACGG |     |
| ureA | F: GCTGACTTAAGAGAACGTTATG  | 337 |
|      | R: GATCATGGCGCTACCTCA      |     |
| uge  | F: GATCATCCGGTCTCCCTGTA    | 534 |
|      | R: TCTTCACGCCTTCCTTCACT    |     |
| wabG | F: CGGACTGGCAGATCCATATC    | 683 |
|      | R: ACCATCGGCCATTTGATAGA    |     |

---
